# Supplementary material for: Heterologous expression of an α-amylase inhibitor from common bean (Phaseolus vulgaris) in Kluyveromyces lactis and Saccharomyces cerevisiae
Source: PubMed Central journal article supplement (PMC5472880; doi:10.1186/s12934-017-0719-4), 2017-06-15
Supplement: 12934_2017_719_MOESM1_ESM.pdf [file 12934_2017_719_MOESM1_ESM.pdf]

# Figure S1

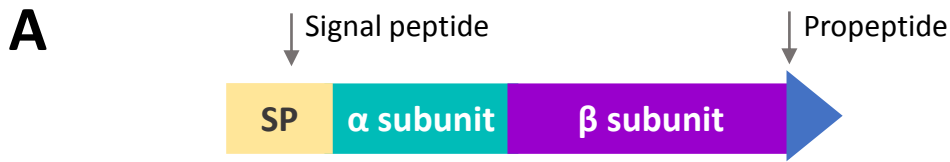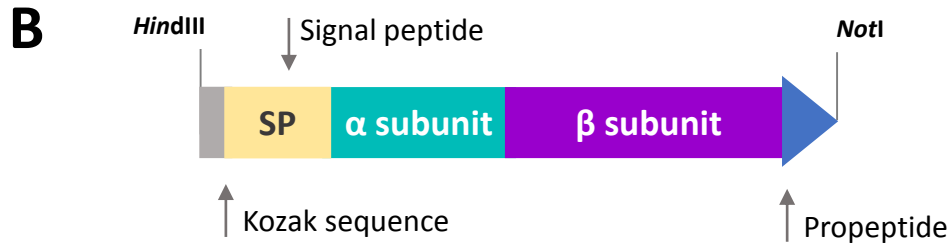

**C**

```

aagcttgaaaaaatggcatcctcaaacttgttgtccttggctttattccttggtcttatta
accttggcaaactccgctaccgaaacttctttaacatcgatggtttaacaagaccaat
ttgatcttacaaggtgacgctatcgtttcttcaaacggaatttgcagttgtcttacaac
agttacgattccatgagtagagccttctattcagctccaattcaaatcagagatagtact
actggtaacgctcgtctcttttgacactaacttcacaatgaacatcagaactcatagacaa
gctaatcagcagttggtttggattttgttttagtcccagttcagcctgagtccaagga
gatacagtcaccgttgaattgacactttcttgtcaagaatttctatcgatgttaacaac
aacgacattaagtctgtccttgggacgttcacgattatgacggtcaaacgtgaggtt
agaatcaacctacaattccagtactaaggtcttcgcagtttcttgttgaacccttctaca
ggaaatcaaatgatgttccaccactgttgaattggagaaggaagttacgactgggtc
agagttggtttctccgcaacaagtggagcctatcagtggtcttacgaaacccatgatgtt
ttatcttggtcatttcttcaaaattcattaaccataaggaccagaagtcagagagaagt
aacatcgttttgaataagattttgtaagcggccgc

```

Restriction sites *HindIII* (5') and *NotI* (3') in black bold;

Kozak sequence underlined;

Signal peptide in **yellow bold**;  $\alpha$ -subunit in **green bold**;  $\beta$ -subunit in **purple bold**;

and propeptide in **blue bold**.

**Figure S1: Schematic representations of Pinto- $\alpha$ AI gene, synthetic gene and its nucleotide sequence.** (A) Native  $\alpha$ AI gene from cv. Pinto comprising signal peptide (SP),  $\alpha$ - and  $\beta$ - subunits and the propeptide sequences; (B) the synthetic  $\alpha$ AI-OPT gene, optimised for expression in yeast, including a Kozak consensus sequence and flanked by *HindIII* and *NotI* restriction sites. (C) Nucleotide sequence of  $\alpha$ AI-OPT gene.
