# Supplementary material for: Heterologous expression of an α-amylase inhibitor from common bean (Phaseolus vulgaris) in Kluyveromyces lactis and Saccharomyces cerevisiae
Source: PubMed Central journal article supplement (PMC5472880; doi:10.1186/s12934-017-0719-4), 2017-06-15
Supplement: 12934_2017_719_MOESM3_ESM.pdf [file 12934_2017_719_MOESM3_ESM.pdf]

# Figure S3

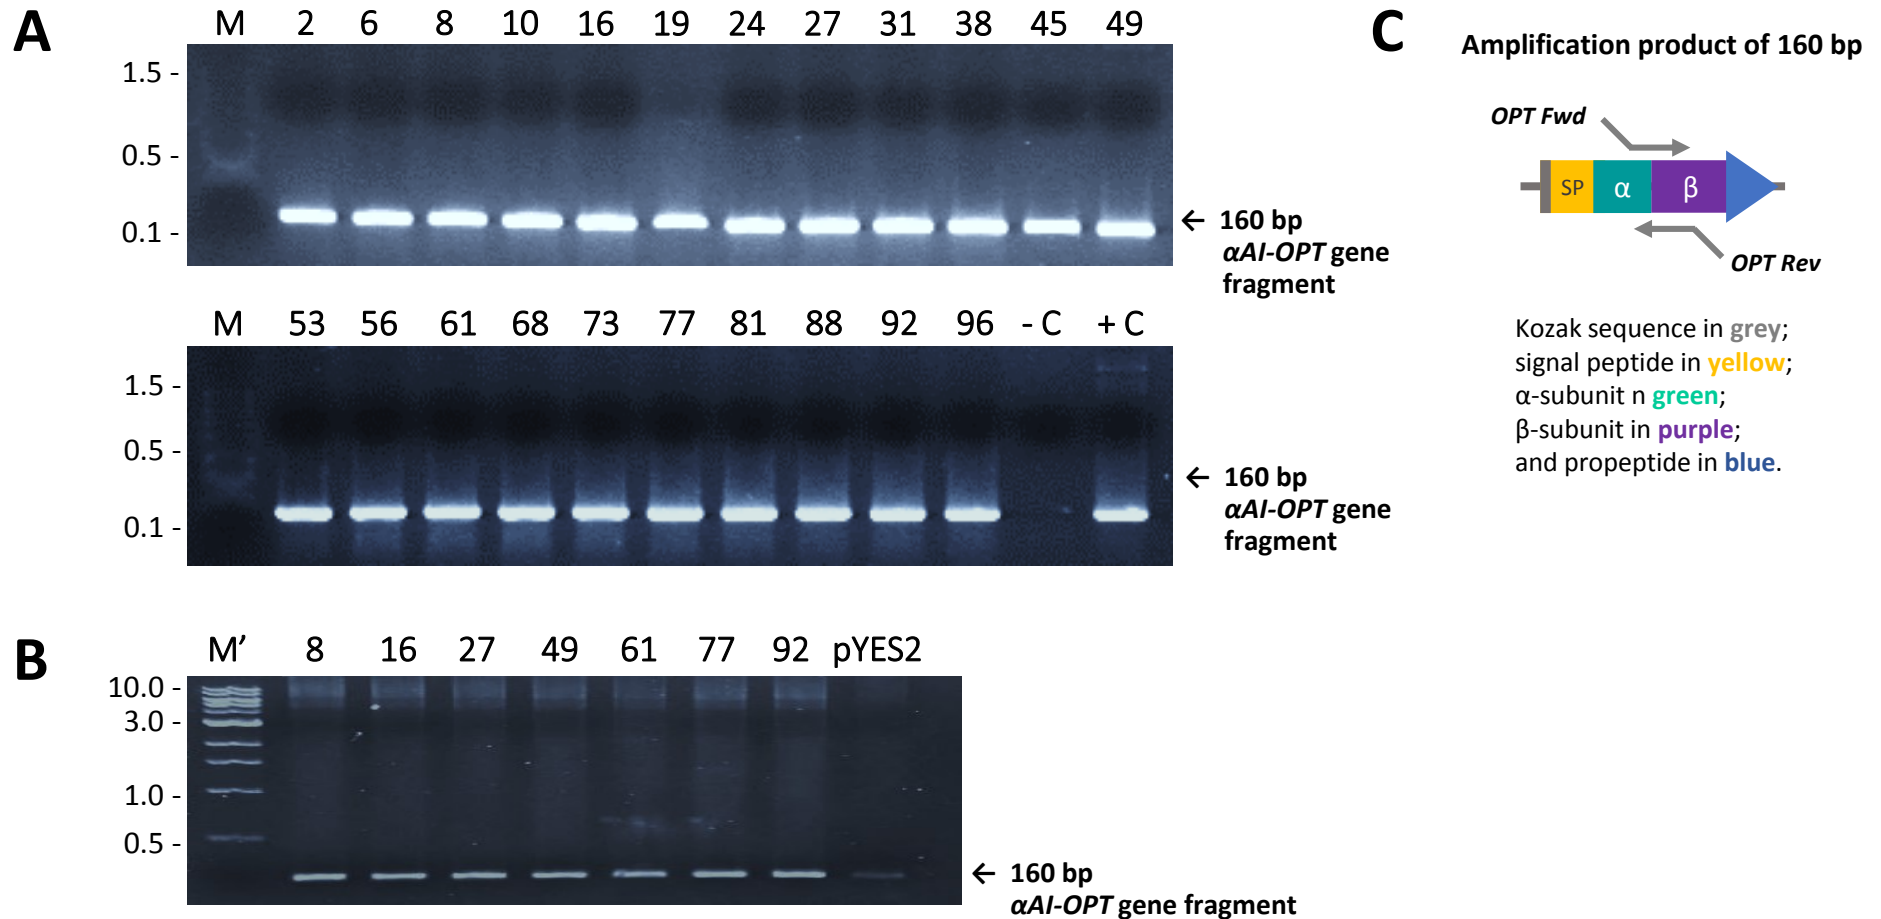

**Figure S3: Genetic analysis of *S. cerevisiae* YPH499 clones with  $\alpha$ AI-OPT.** (A) Colony PCR of random colonies of *S. cerevisiae* YPH499 transformed with  $\alpha$ AI-OPT (primers *OPT Fwd*/*OPT Rev*). Purified water used as PCR negative control (-C) and plasmid DNA from pYES2- $\alpha$ AI-OPT used as positive control (+C). DNA Ladder 100 bp NEB® (M). (B) PCR determination of  $\alpha$ AI-OPT gene on plasmid DNA isolated from transformants of *S. cerevisiae* YPH499 with  $\alpha$ AI-OPT (primers *OPT Fwd*/*OPT Rev*). (C) Schematic representation of amplification product with primers *OPT Fwd*/*OPT Rev*. Plasmid DNA from parent strain transformed with empty plasmid (pYES2) used as negative control. DNA Ladder 1 Kb Promega™ (M').
