# Supplementary material for: Heterologous expression of an α-amylase inhibitor from common bean (Phaseolus vulgaris) in Kluyveromyces lactis and Saccharomyces cerevisiae
Source: PubMed Central journal article supplement (PMC5472880; doi:10.1186/s12934-017-0719-4), 2017-06-15
Supplement: 12934_2017_719_MOESM4_ESM.pdf [file 12934_2017_719_MOESM4_ESM.pdf]

# Figure S4

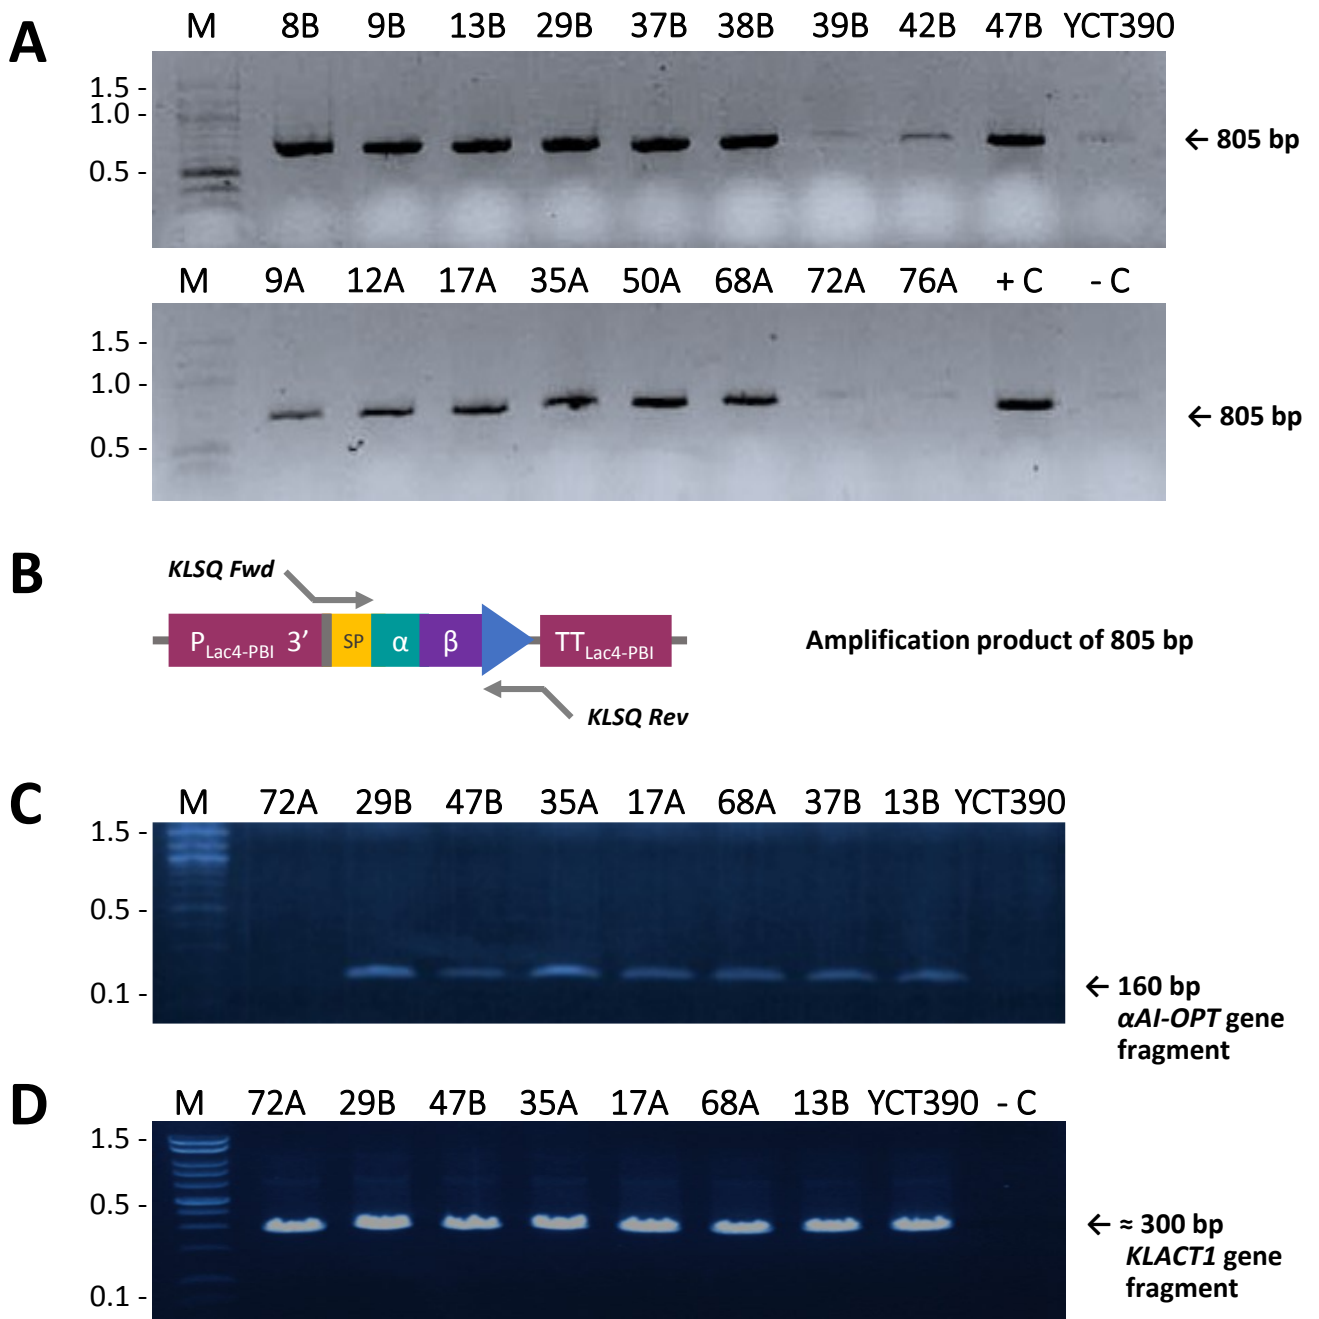

**Figure S4: Genetic analysis of *K. lactis* YCT390 transformants with  $\alpha$ AI-OPT.** (A) Indirect determination by PCR of  $\alpha$ AI-OPT gene inserted into pKLAC2 using sequencing primers *KLSQ Fwd*/*KLSQ Rev* in transformants of *K. lactis* YCT390 8B, 9B, 13B, 29B, 37B, 38B, 39B, 42B, 47B, 9A, 12A, 17A, 35A, 50A, 68A, 72A and 76A. (B) Schematic representation of amplification product (805 bp) with primers *KLSQ Fwd*/*KLSQ Rev*. PCR determination of (C)  $\alpha$ AI-OPT gene fragment with primers *OPT Fwd*/*OPT Rev*, and (D) *KLACTION1* gene fragment (single copy gene in *K. lactis* genome) with primers *KLACTION1 Fwd*/*KLACTION1 Rev*, in transformants of *K. lactis* YCT390 13B, 29B, 37B, 47B, 17A, 35A and 68A. Genomic DNA from untransformed strain YCT390 used as negative control. Purified water used as PCR negative control (- C) and plasmid DNA from pKLAC2- $\alpha$ AI-OPT used as PCR positive control (+ C). DNA Ladder 100 bp NEB® (M).
